# Supplementary material for: Global carbon emission accounting: national-level assessment of wildfire CO 2 emission – a case study of China
Source: Copernicus journal article supplement (doi:10.5194/egusphere-2024-1684), 2024-06-27
Supplement: Supplementary file 1 [file egusphere-2024-1684-supplement.pdf]

# Global carbon emission accounting: national-level assessment of wildfire CO<sub>2</sub> emission—a case study of China

Xuehong Gong<sup>1,2</sup>, Zeyu Liu<sup>2,3</sup>, Jie Tian<sup>2,3</sup>, Qiyuan Wang<sup>2,3</sup>, Guohui Li<sup>2,3</sup>, Zhisheng An<sup>1,2</sup>, Yongming Han<sup>2,3\*</sup>

5 <sup>1</sup> State Key Laboratory of Earth Surface Processes and Resource Ecology, Faculty of Geographical Science, Beijing Normal University, Beijing 100875, China

<sup>2</sup> State Key Laboratory of Loess and Quaternary Geology, Institute of Earth Environment, Chinese Academy of Sciences, Xi'an 710061, China

10 <sup>3</sup> National Observation and Research Station of Regional Ecological Environment Change and Comprehensive Management in the Guanzhong Plain, Xi'an 710061, China

*Correspondence to:* Yongming Han (yongming@ieecas.cn)

## 1 Statistical methods

The Mann-Kendall trend test is a non-parametric statistical method widely used for analyzing trends in time series data. This method does not require data to follow a specific distribution, making it particularly suitable for environmental science and meteorology fields. The calculation formula for the Mann-Kendall trend test is as follows:

$$S = \sum_{k=1}^{n-1} \sum_{j=k+1}^n \text{sign}(x_j - x_k)$$

where  $n$  is the total number of data points,  $x_j$  and  $x_k$  are numerical values in the time series,  $\sum_{k=1}^{n-1} \sum_{j=k+1}^n \text{sign}(x_j - x_k)$  is the sign function of the difference between  $x_j$  and  $x_k$ . Based on the statistic  $S$ , the standardized statistic  $Z$  of Mann Kendall can be calculated, as follows:

$$Z(S) = \frac{S - E(S)}{\sqrt{\text{VAR}(S)}}$$

20 where  $E(S)$  and  $\text{VAR}(S)$  are the expected value and variance of the statistical measure  $S$ . By using the  $Z$ -value, we can determine the trend direction and significance in the time series. When the  $Z$  value is greater than the critical value, it indicates a significant upward trend; When the negative value of  $Z$  is less than the critical value, it indicates a significant downward trend. If the  $Z$  value is near zero, the time series has no significant trend. The significance of the trend is verified through a  $p$ -value, which represents the probability that the observed trend is generated by a random process. Commonly used significance levels include 90%, 95%, and 99%.

25 Spatial autocorrelation analysis usually uses Anselin's Moran's  $I$  index and Getis coefficient as basic measures, which can reflect the statistical correlation of specific attribute values in space (Anselin et al., 1995). The calculation formula is as follows:

$$I = \frac{n}{S_0} \times \frac{\sum_{i=1}^n \sum_{j=1}^n w_{ij} (x_i - \bar{x})(x_j - \bar{x})}{\sum_{i=1}^n (x_i - \bar{x})^2}$$

30 where I is the Global Moran's I index, n is the total number of spatial elements. This study is calculated in units of Chinese prefecture-level cities, which is the total number of Chinese prefecture-level cities.  $(x_i - \bar{x})$  and  $(x_j - \bar{x})$  are the error between the observed values and the average values of specific attribute values on the ith and jth geographic space units, respectively.  $x_i$  is the observed value, which is the CO<sub>2</sub> emissions of each geographic space unit.  $\bar{x}$  is the average value of  $x_i$ ,  $w_{ij}$  is the weight matrix for the adjacency relationships between geographical units. The Moran's I index is between -1 and 1. When I>0, it indicates a positive correlation between spatial elements, and when I<0, it indicates a negative correlation between spatial elements; When I=0, it indicates no spatial correlation, meaning that the space is randomly distributed. Similar to Mann Kendall, the calculation results are tested using a z-value.

35 Spearman correlation coefficient is a non-parametric statistical method used to measure the strength and direction of non-linear relationships between two variables. It is based on the rank of two variables rather than the specific values of the original data, so it has good robustness for datasets that do not meet the assumption of normal distribution or have outliers. When the correlation coefficient is 1, it indicates a perfect positive monotonic relationship between the two variables. The correlation coefficient of -1 signifies a perfect negative monotonic relationship. A correlation coefficient of 0 suggests no monotonic relationship between the two variables. Spearman correlation coefficients are commonly used to process rank data, such as ranking data, or for correlation analysis in small sample sizes where the assumption of normal distribution is difficult to satisfy.

45 **Table S1** CO<sub>2</sub> emission factors of different vegetation cover types in China

| Paper                  | Species        | Emission factor (g/kg) |
|------------------------|----------------|------------------------|
| Akagi et al. (2011)    | Forest         | 1710 ± 39              |
| Burling et al. (2011)  | Forest         | 1668 ± 72              |
| Prichard et al. (2020) | Conifer forest | 1576 ± 248             |
| Prichard et al. (2020) | Mixed forest   | 1650 ± 61              |
| Jin et al. (2022)      | Forest         | 1392.54 ± 248.53       |
| Prichard et al. (2020) | Shrub          | 1708 ± 192             |
| Jin et al. (2022)      | Shrub          | 1487.8 ± 18.05         |
| Akagi et al. (2011)    | Savanna        | 1565 ± 159             |
| Prichard et al. (2020) | Grass          | 1686 ± 81              |
| Jin et al. (2022)      | Grass          | 1465.84 ± 60.45        |
| Cao et al. (2008)      | Wheat          | 1377 ± 431             |
| Sahai et al. (2007)    | Wheat          | 1130                   |
| Zhang et al. (2008)    | Wheat          | 791.3                  |
| Wang et al. (2009)     | Wheat          | 911.65 ± 105           |

|                     |      |               |
|---------------------|------|---------------|
| Cao et al. (2008)   | corn | 1327 ± 710    |
| Wei et al. (2012)   | corn | 959           |
| Wang et al. (2009)  | corn | 1265.4 ± 91.2 |
| Cao et al. (2008)   | rice | 1674 ± 452    |
| Zhang et al. (2008) | rice | 791 ± 12.5    |
| Wang et al. (2009)  | rice | 976.8 ± 58.5  |

**Table S2** Main emission regions in high emission years under different vegetation cover types

| vegetation cover type | year | Total emissions(Tg) | Main emissions regions               | The proportion of major regions in the total emissions of the year |
|-----------------------|------|---------------------|--------------------------------------|--------------------------------------------------------------------|
| Forest                | 2003 | 34.4                | Heilongjiang, Inner Mongolia         | 77.0%                                                              |
| Forest                | 2008 | 40.3                | Inner Mongolia                       | 50.3%                                                              |
| Shrub                 | 2003 | 14.0                | Yunnan, Inner Mongolia, Heilongjiang | 69.9%                                                              |
| Shrub                 | 2010 | 18.2                | Yunnan, Guizhou                      | 87.4%                                                              |
| Grassland             | 2003 | 1.7                 | Inner Mongolia, Heilongjiang         | 89.9%                                                              |
| Grassland             | 2008 | 1.3                 | Inner Mongolia                       | 72.0%                                                              |
| Cropland              | 2012 | 25.4                | Anhui                                | 48.4%                                                              |
| Cropland              | 2014 | 30.2                | Heilongjiang                         | 47.8%                                                              |
| Cropland              | 2015 | 22.8                | Heilongjiang                         | 57.1%                                                              |
| Cropland              | 2017 | 25.8                | Heilongjiang                         | 70.0%                                                              |

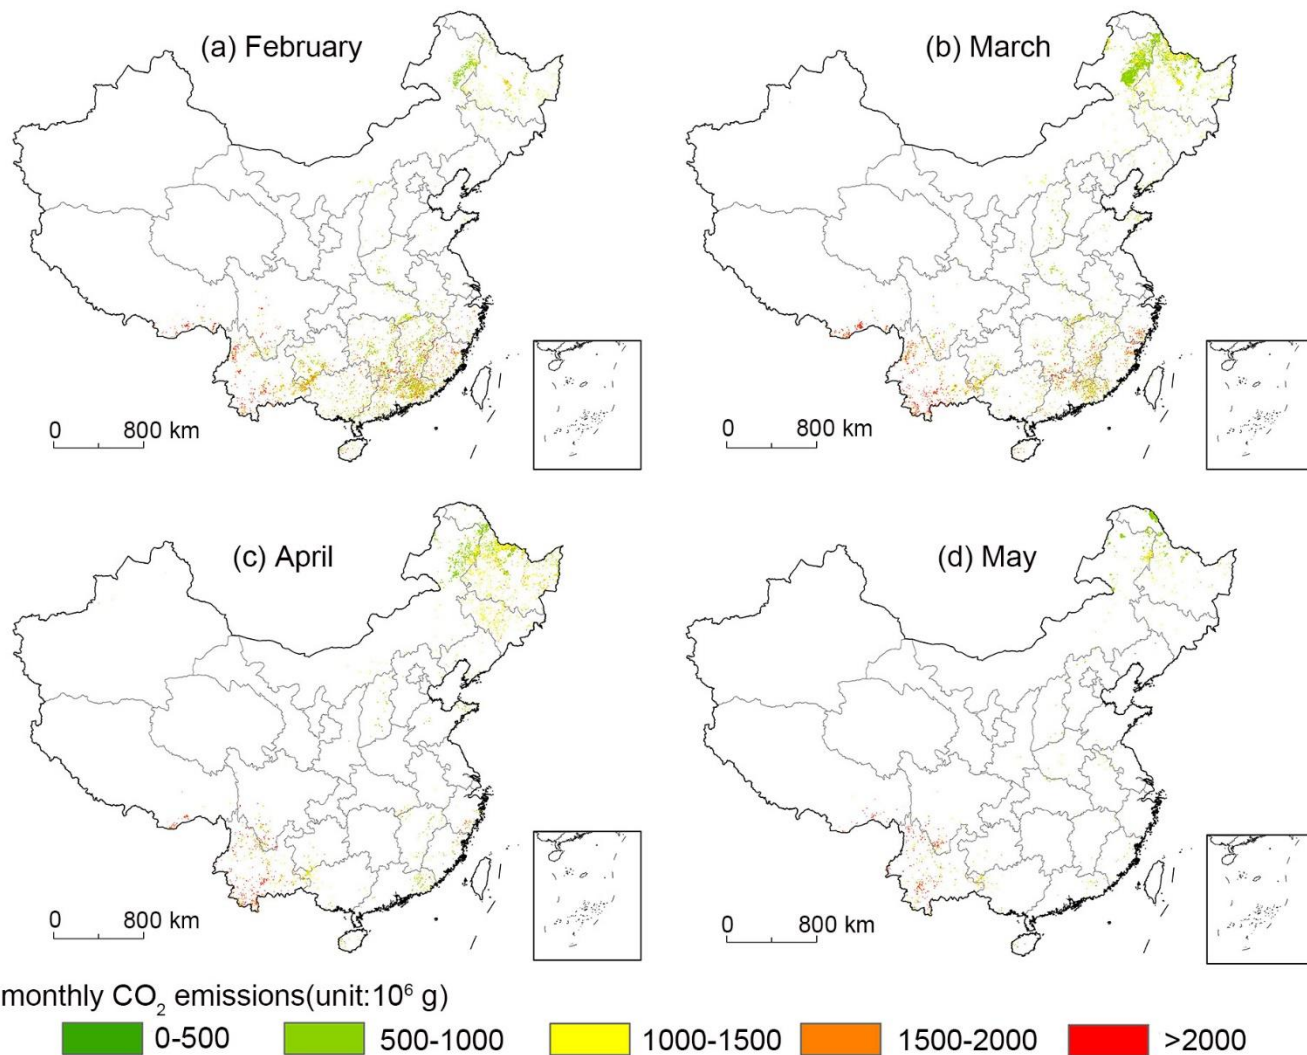

**Figure S1: Spatial distribution of monthly CO<sub>2</sub> emissions within forest fires from 2001 to 2022 in China: (a) February, (b) March, (c) April, and (d) May.**

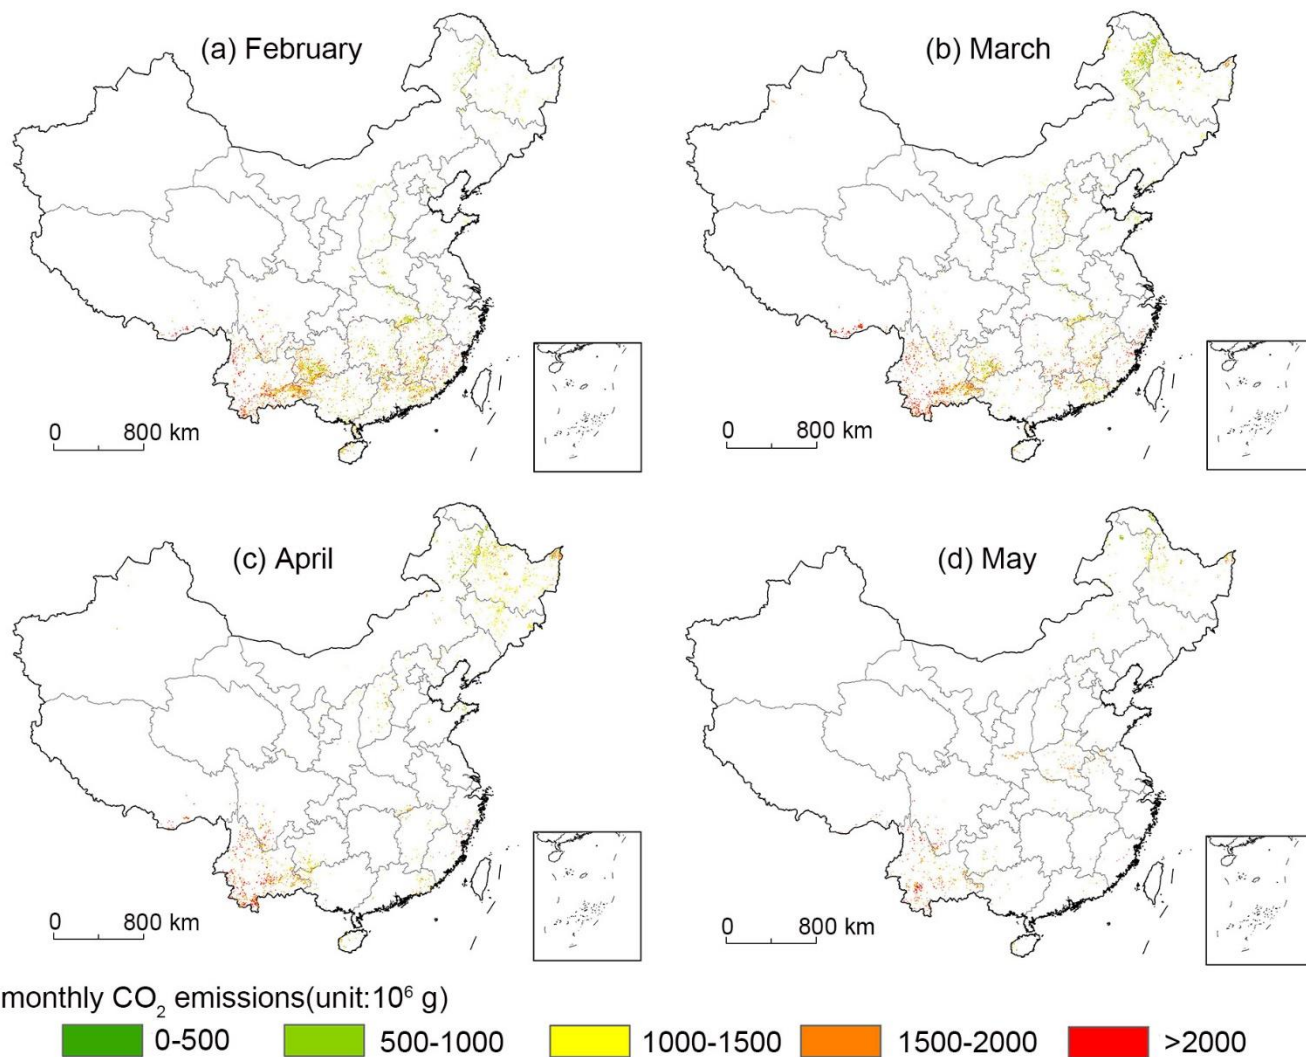

**Figure S2: Spatial distribution of monthly CO<sub>2</sub> emissions within shrub fires from 2001 to 2022 in China: (a) February, (b) March, (c) April, and (d) May.**

50

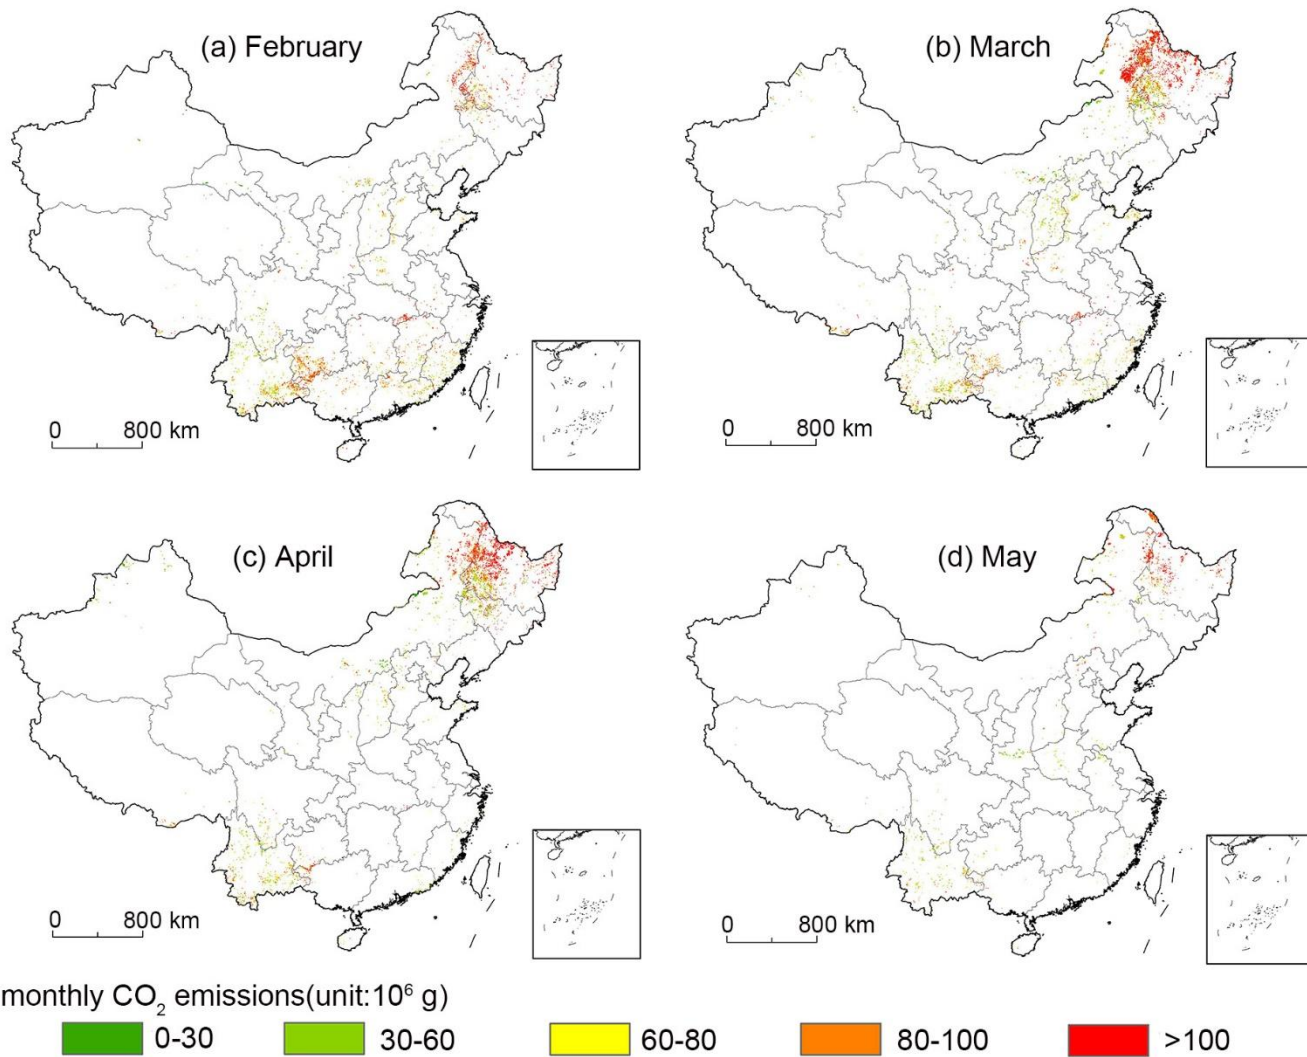

55 **Figure S3: Spatial distribution of monthly CO<sub>2</sub> emissions within grassland fires from 2001 to 2022 in China: (a) February, (b) March, (c) April, and (d) May.**

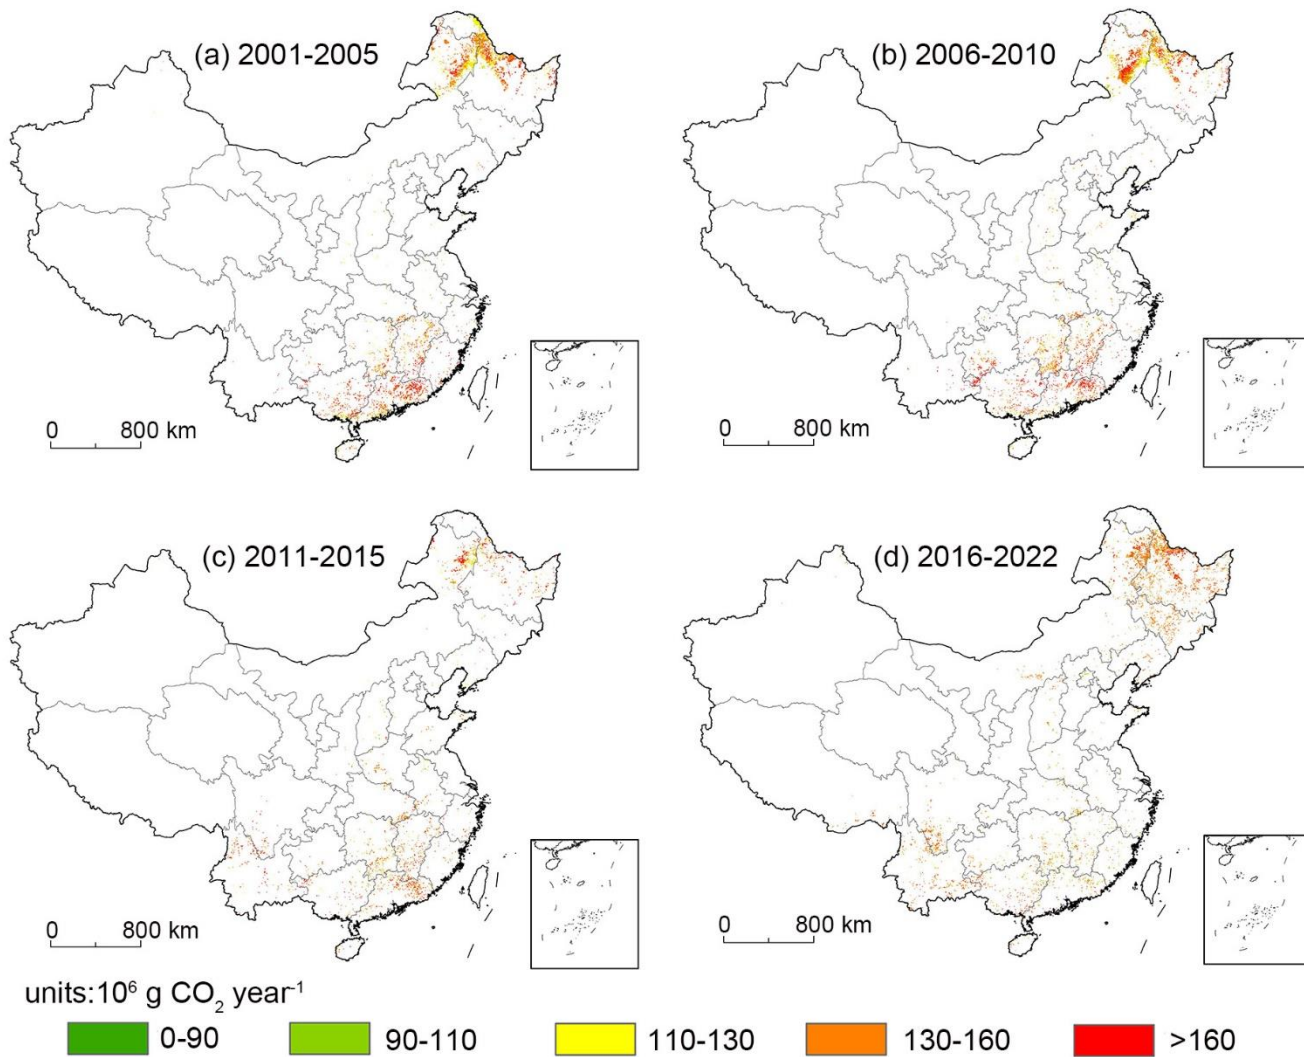

**Figure S4: Spatial distribution of annual CO<sub>2</sub> emissions for forest fires from (a) 2001 to 2005, (b) 2005 to 2010, (c) 2011 to 2015, and (d) 2016 to 2022.**



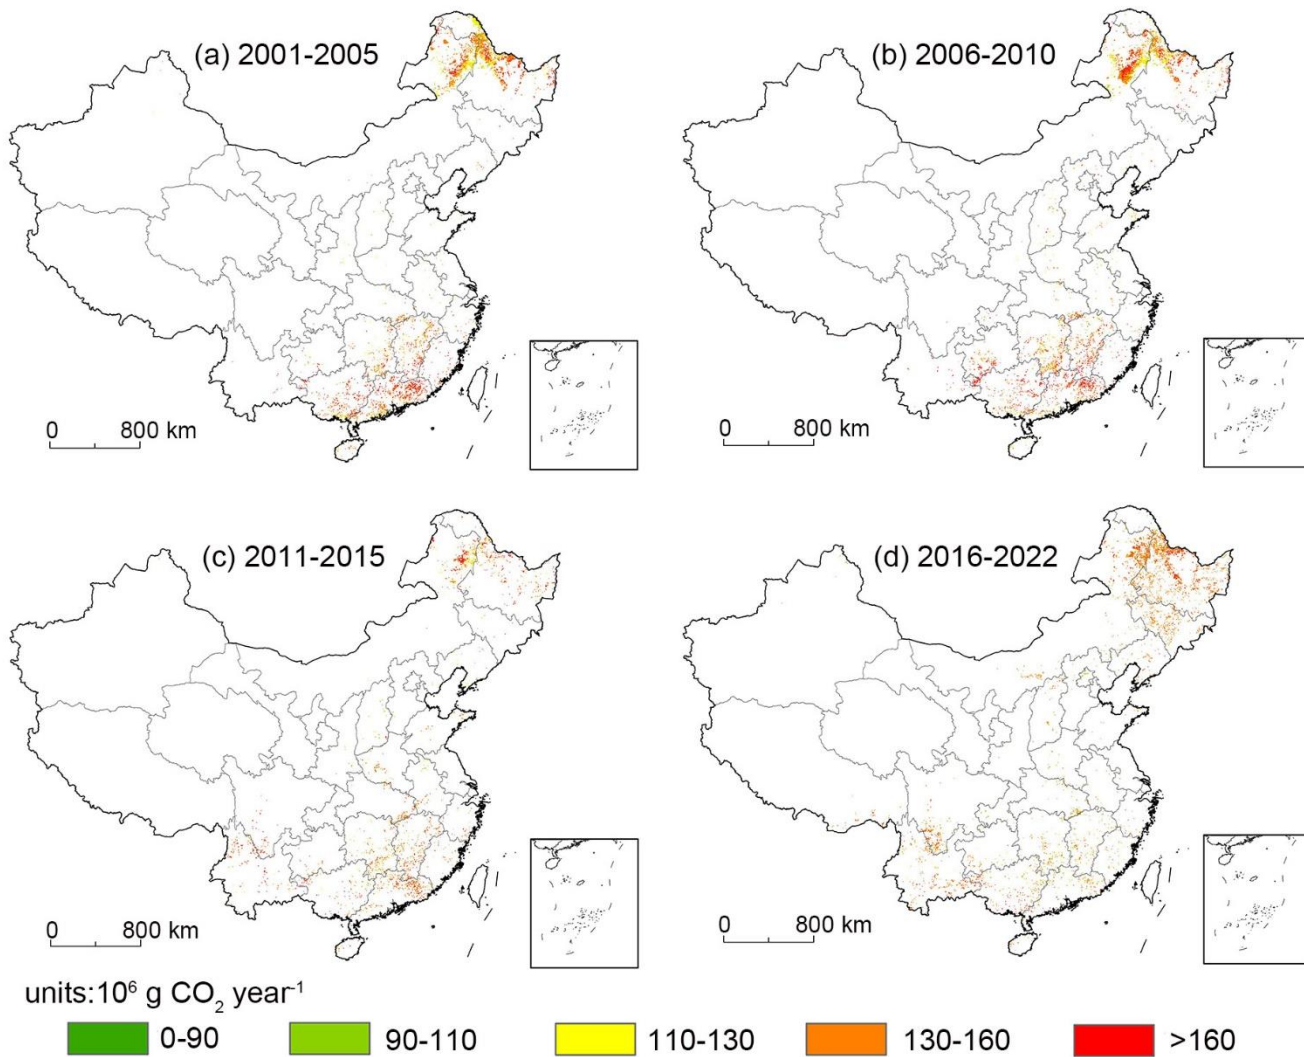

60 **Figure S5: Spatial distribution of annual CO<sub>2</sub> emissions for shrub fires from (a) 2001 to 2005, (b) 2005 to 2010, (c) 2011 to 2015, and (d) 2016 to 2022.**



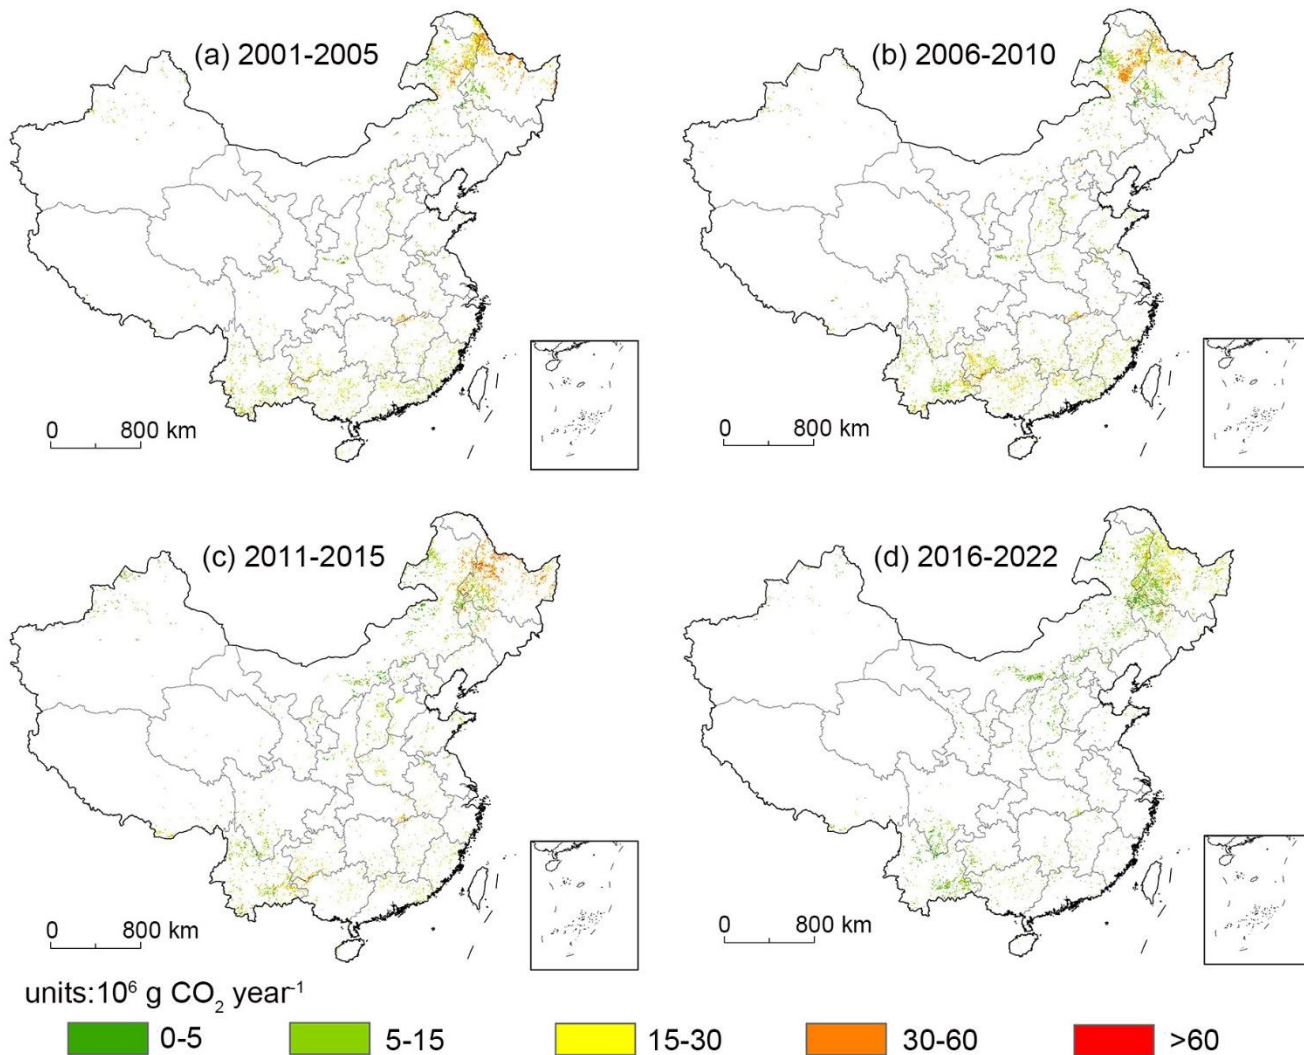

**Figure S6: Spatial distribution of annual CO<sub>2</sub> emissions for grassland fires from (a) 2001 to 2005, (b) 2005 to 2010, (c) 2011 to 2015, and (d) 2016 to 2022.**

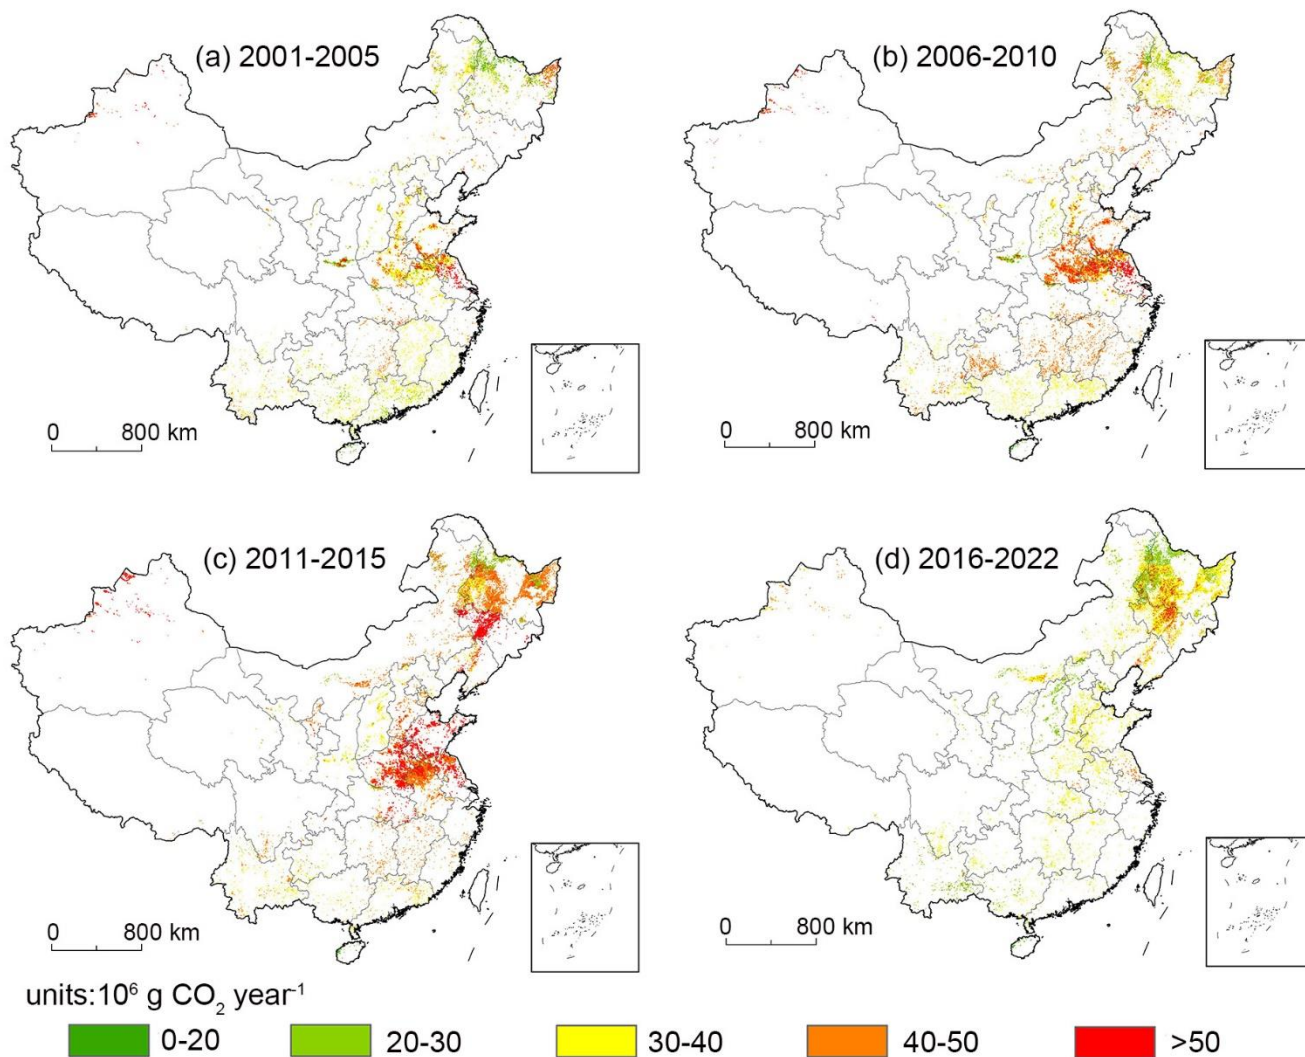

65

**Figure S7: Spatial distribution of annual CO<sub>2</sub> emissions for cropland fires from (a) 2001 to 2005, (b) 2005 to 2010, (c) 2011 to 2015, and (d) 2016 to 2022.**

## References

- 70 Akagi, S. K., Yokelson, R. J., Wiedinmyer, C., Alvarado, M. J., Reid, J. S., Karl, T., Crouse, J. D., and Wennberg, P. O.: Emission factors for open and domestic biomass burning for use in atmospheric models, *Atmos. Chem. Phys.*, 11, 4039–4072, <https://doi.org/10.5194/acp-11-4039-2011>, 2011.

- Anselin, L.: Local Indicators of Spatial Association—LISA, *Geogr. Anal.*, 27, 93–115, <https://doi.org/10.1111/j.1538-4632.1995.tb00338.x>, 1995.
- 75 Burling, I. R., Yokelson, R. J., Akagi, S. K., Urbanski, S. P., Wold, C. E., Griffith, D. W. T., Johnson, T. J., Reardon, J., and Weise, D. R.: Airborne and ground-based measurements of the trace gases and particles emitted by prescribed fires in the United States, *Atmos. Chem. Phys.*, 11, 12197–12216, <https://doi.org/10.5194/acp-11-12197-2011>, 2011.
- Cao, G., Wang, F., and Wang, Y.: Emission inventory of TSP, PM<sub>10</sub> and PM<sub>2.5</sub> emissions from biomass burning in China, *The Chinese Journal of Process Engineering*, 4, 700–704, 2004 (in Chinese).
- 80 Jin, Q., Wang, W., Zheng, W., Innes, J. L., Wang, G., and Guo, F.: Dynamics of pollutant emissions from wildfires in Mainland China, *J. Environ. Manage.*, 318, 115499, <https://doi.org/10.1016/j.jenvman.2022.115499>, 2022.
- Prichard, S. J., O’Neill, S. M., Eagle, P., Andreu, A. G., Drye, B., Dubowy, J., Urbanski, S., and Strand, T. M.: Wildland fire emission factors in North America: synthesis of existing data, measurement needs and management applications, *Int. J. Wildland Fire*, 29, 132, <https://doi.org/10.1071/WF19066>, 2020.
- 85 Sahai, S., Sharma, C., Singh, D. P., Dixit, C. K., Singh, N., Sharma, P., Singh, K., Bhatt, S., Ghude, S., Gupta, V., Gupta, R. K., Tiwari, M. K., Garg, S. C., Mitra, A. P., and Gupta, P. K.: A study for development of emission factors for trace gases and carbonaceous particulate species from in situ burning of wheat straw in agricultural fields in india, *Atmos. Environ.*, 41, 9173–9186, <https://doi.org/10.1016/j.atmosenv.2007.07.054>, 2007.
- Wang, S., Wei, W., Du, L., Li, G., and Hao, J.: Characteristics of gaseous pollutants from biofuel-stoves in rural China, *Atmos. Environ.*, 43, 4148–4154, <https://doi.org/10.1016/j.atmosenv.2009.05.040>, 2009.
- 90 Wei, W., Zhang, W., Hu, D., Ou, L., Tong, Y., Shen, G., Shen, H., and Wang, X.: Emissions of carbon monoxide and carbon dioxide from uncompressed and pelletized biomass fuel burning in typical household stoves in China, *Atmos. Environ.*, 56, 136–142, <https://doi.org/10.1016/j.atmosenv.2012.03.060>, 2012.
- Zhang, H., Ye, X., Cheng, T., Chen, J., Yang, X., Wang, L., and Zhang, R.: A laboratory study of agricultural crop residue combustion in China: Emission factors and emission inventory, *Atmos. Environ.*, 42, 8432–8441, <https://doi.org/10.1016/j.atmosenv.2008.08.015>, 2008.
